# Supplementary material for: Smart Wearable Sensors Based on Triboelectric Nanogenerator for Personal Healthcare Monitoring
Source: MDPI journal article supplement (doi:10.3390/mi12040352), 2021-03-25
Supplement: s1 [file s1]

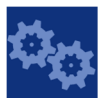

# Supplementary Materials: Smart Wearable Sensors Based on Triboelectric Nanogenerator for Personal Healthcare Monitoring

Ruonan Li, Xuelian Wei, Jiahui Xu, Junhuan Chen, Bin Li, Zhiyi Wu and Zhong Lin Wang

## Supplementary Figures

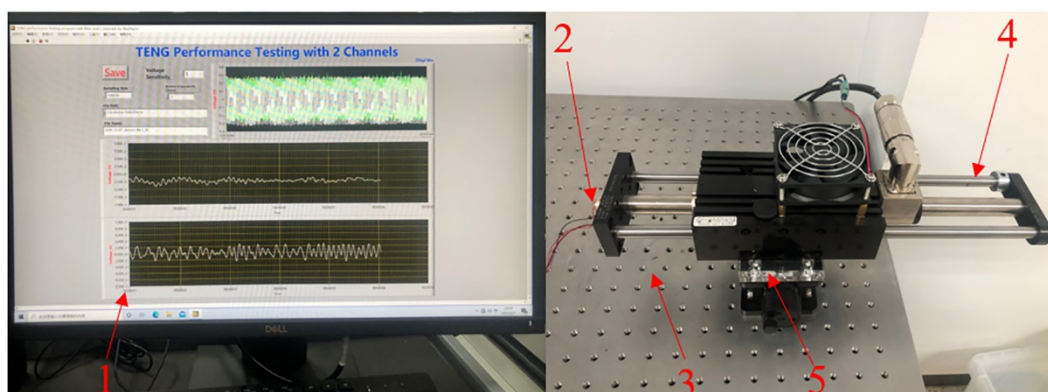

1. LabVIEW test program
2. The SWS
3. Optical table
4. Linear motor
5. Lifting platform

**Figure S1.** Experimental setup for the fundamental test.

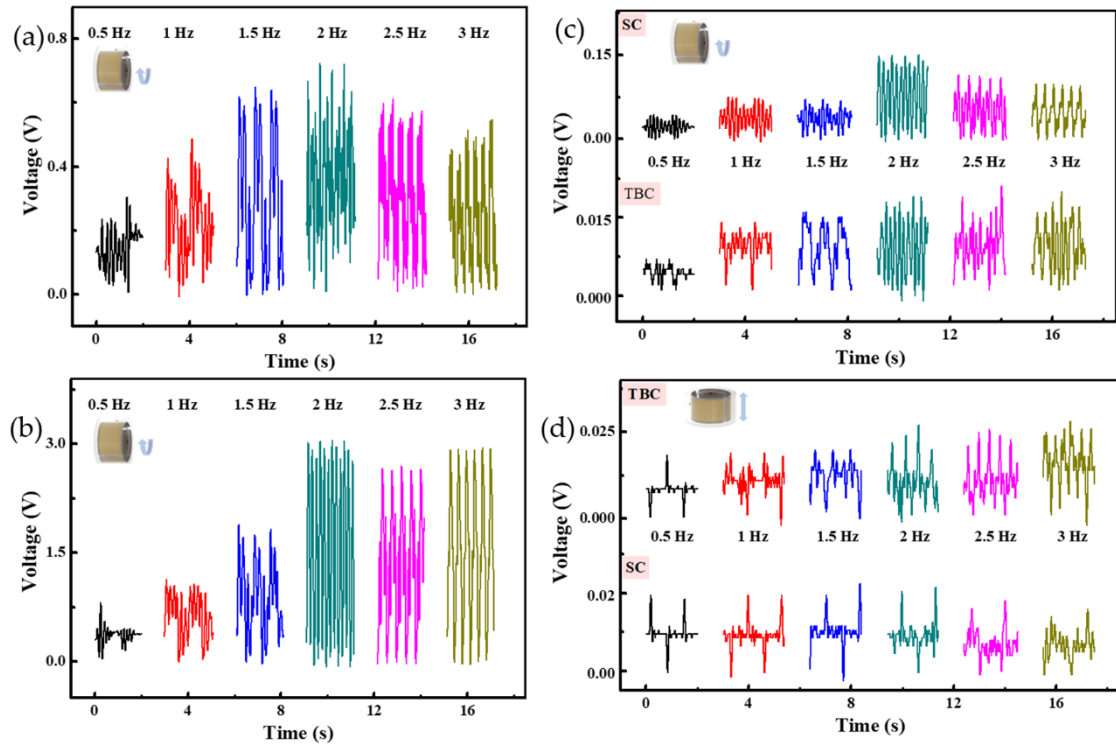

**Figure S2.** Electrical characterization of the SWS with different triboelectric materials, number of channels and moving directions: side-channel (a) FT-SWS and (b) PT-SWS rotating along the circumference; dual-channel PT-SWS moving in (c) circumference direction and (d) top and down direction.

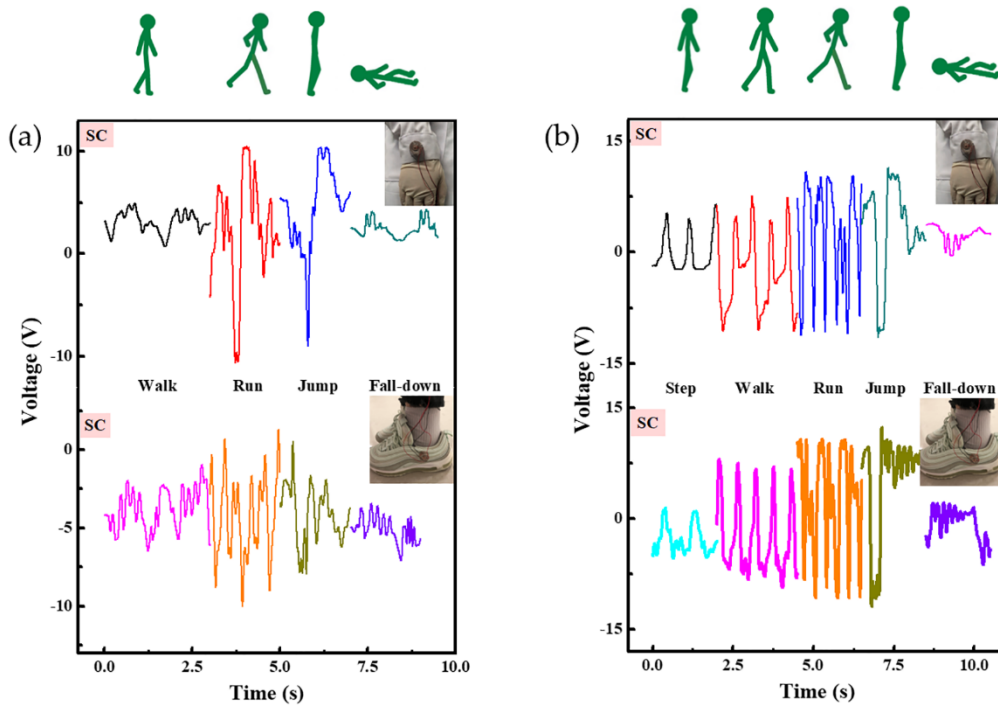

**Figure S3.** Motion state monitoring signals of side-channel (a) FT-SWS and (b) PT-SWS When they were put on the wrist and shoe.

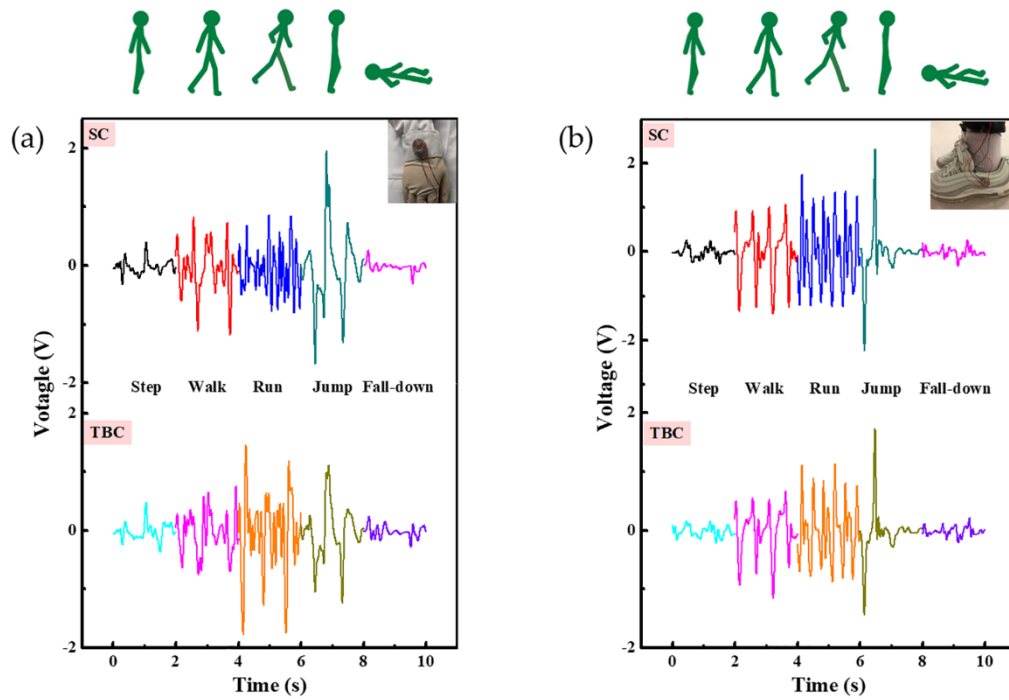

**Figure S4.** Motion state monitoring signals of two-channel PT-SWS in different wearing parts: **(a)** Wrist; **(b)** Shoe.

### Supplementary Note

#### Note S1. The equation of travel distance and motion speed obtained by the sensor.

Movement distance ( $s$ ) and motion speed ( $v$ ) can be obtained by the following equations.

$$s = n \times L \quad (1)$$

$$v = L \times f \quad (2)$$

where  $L$  and  $f$  represent stride and frequency respectively, and  $n$  represents the number of positive or negative voltage peak.

### Supplementary Videos

**Video S1.** The COMSOL simulation animation of SC.

**Video S2.** The COMSOL simulation animation of TBC.

**Video S3.** Water resistance test of the SWS.

**Video S4.** The fall-down alarm system demonstration based on the SWS.
